# Supplementary material for: Translation Inhibition by Rocaglates Activates a Species-Specific Cell Death Program in the Emerging Fungal Pathogen Candida auris
Source: PubMed Central journal article supplement (PMC7064782; doi:10.1128/mbio.03329-19), 2020-03-10
Supplement: mBio.03329-19-sf002.pdf [file mBio.03329-19-sf002.pdf]

**A.**

|                            |                                                                |             |     |
|----------------------------|----------------------------------------------------------------|-------------|-----|
|                            |                                                                | 146/147 151 |     |
| <i>C. tropicalis</i>       | ITAIGLYLNVTVHASIGGTSMSDDIEAFR-SGVQIVVCTPGRVLDMIERRYFKTDKVKMF   |             | 169 |
| <i>C. albicans</i>         | ITAIGLYLKVTVHASIGGTSMSDDIEAFR-SGVQIVVCTPGRVLDMIERRYFKTDKVKMF   |             | 169 |
| <i>C. dubliniensis</i>     | ITAIGLYLKVTVHASIGGTSMSDDIEAFR-SGVQIVVCTPGRVLDMIERRYFKTDKVKMF   |             | 169 |
| <i>C. lusitaniae</i>       | ISHIGLYLNVTVHASIGGTSMSDDIEAFR-SGVQIVVCTPGRVSDMIERRYFKTHKVKMF   |             | 168 |
| <i>C. auris</i>            | ISHIGLYLKVSVHASIGGTSMSDDIEAFR-SGVQIVVCTPGRVFDIMIDRRYFKTHKVKMF  |             | 168 |
| <i>C. haemulonii</i>       | IKHIGLYLKVSVHASIGGTSMSDDIEAFR-SGVQIVVCTPGRVFDIMIDRRYFKTHRVKMF  |             | 168 |
| <i>C. duobushaemulonii</i> | IKHIGLYLKVSVHASIGGTSMSDDIEAFR-SGVQIVVCTPGRVFDIMIDRRYFKTHRVKMF  |             | 168 |
| <i>C. glabrata</i>         | VMALGFHMDIKVHACIGGTSFVEDAEGLR-D-AQIVVCTPGRVFDNIQRRKFVDNIKMF    |             | 168 |
| <i>S. cerevisiae</i>       | VMALAFHMDIKVHACIGGTSFVEDAEGLR-D-AQIVVCTPGRVFDNIQRRRFRTDKIKMF   |             | 167 |
| <i>C. neoformans</i>       | VIALGDYLNVDCHACVGGTAVREDIARLN-EGPHIVVCTPGRVFDMINRGALKTEAVMMF   |             | 174 |
| <i>H. sapiens</i>          | VMALGDYMGASCHACIGGTVNRAEVQKLQMEAPHIIVCTPGRVFDMLNRRYLSPKYIKMF   |             | 179 |
|                            |                                                                | 180 183 187 |     |
| <i>C. tropicalis</i>       | ILDEADEMLSSGFKEQIYNIFFRLLPETTQVVLLSATMPQEVLEVTTKFMNPNVIRILVKKD |             | 229 |
| <i>C. albicans</i>         | ILDEADEMLSSGFKEQIYNIFFRLLPETTQIVLLSATMPQDVLEVTTKFMNPNVIRILVKKD |             | 229 |
| <i>C. dubliniensis</i>     | ILDEADEMLSSGFKEQIYNIFFRLLPETTQIVLLSATMPQDVLEVTTKFMNPNVIRILVKKD |             | 229 |
| <i>C. lusitaniae</i>       | ILDEADEMLSSGFKEQIYNIFFKLLPETTQVVLLSATMPQDVLEVTTKFMNPNVIRILVKKD |             | 228 |
| <i>C. auris</i>            | ILDEADEMLSSGFKEQIYNIFFKLLPETTQVVLLSATMPQDVLEVTTKFMNPNVIRILVKKD |             | 228 |
| <i>C. haemulonii</i>       | ILDEADEMLSSGFKEQIYNIFFKLLPETTQVVLLSATMPQDVLEVTTKFMNPNVIRILVKKD |             | 228 |
| <i>C. duobushaemulonii</i> | ILDEADEMLSSGFKEQIYNIFFKLLPETTQVVLLSATMPQDVLEVTSKFMNPNVIRILVKKD |             | 228 |
| <i>C. glabrata</i>         | ILDEADEMLSTGFKEQIYCIFFTMLPPTQVVLLSATMPRDVLEVTTAKFMQNPVIRILVKKD |             | 228 |
| <i>S. cerevisiae</i>       | ILDEADEMLSSGFKEQIYCIFFTLPPPTQVVLLSATMPNDVLEVTTKFMNPNVIRILVKKD  |             | 227 |
| <i>C. neoformans</i>       | CLDEADEMLSTGFKEIYIYIIFQLLPGETQVVLLSATMAPEVLDVTTKFMRDPIRILVKKD  |             | 234 |
| <i>H. sapiens</i>          | VLDEADEMLSRGKEDQIYDIFQKLNSTQVVLLSATMPSDVLEVTTKFMRDPIRILVKKE    |             | 239 |

**B.**

| Species            | # Isolates Assessed | Amino Acid at Residue 151 |
|--------------------|---------------------|---------------------------|
| <i>C. albicans</i> | 40                  | L                         |
| <i>C. auris</i>    | 132                 | F                         |
