# Supplementary material for: Translation Inhibition by Rocaglates Activates a Species-Specific Cell Death Program in the Emerging Fungal Pathogen Candida auris
Source: PubMed Central journal article supplement (PMC7064782; doi:10.1128/mbio.03329-19), 2020-03-10

**A.***C. auris**C. auris* eIF4A<sup>F152L</sup>*C. albicans* Tif1<sup>L153F</sup>

Untreated

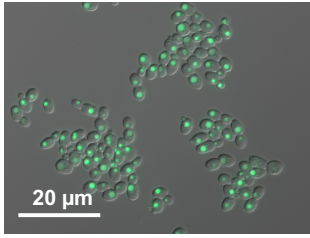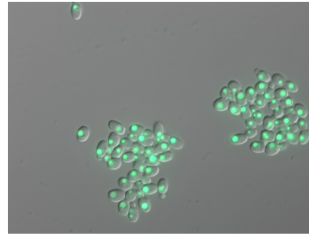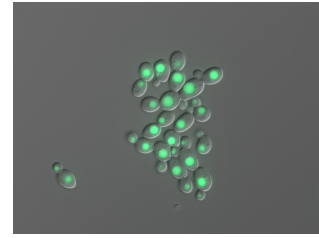

CMLD010515

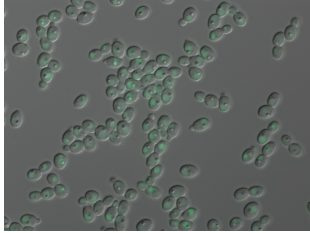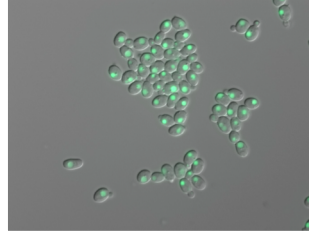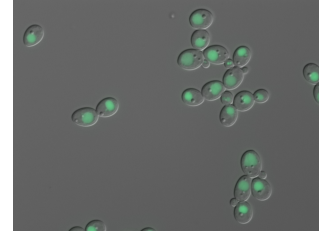**B.***C. auris**C. auris* eIF4A<sup>F152L</sup>*C. albicans* Tif1<sup>L153F</sup>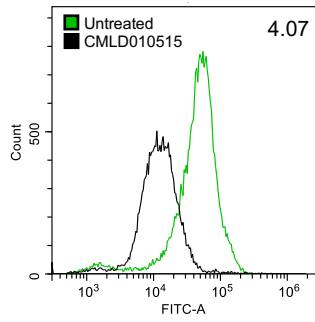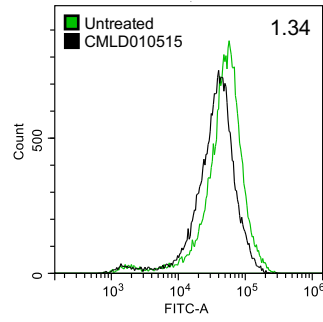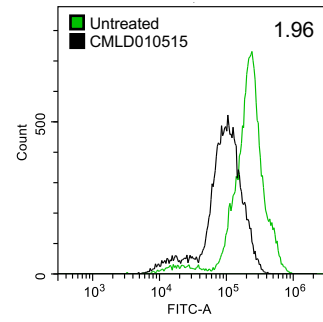

Supplement: mBio.03329-19-sf003.pdf [file mBio.03329-19-sf003.pdf]
