# Supplementary material for: Translation Inhibition by Rocaglates Activates a Species-Specific Cell Death Program in the Emerging Fungal Pathogen Candida auris
Source: PubMed Central journal article supplement (PMC7064782; doi:10.1128/mbio.03329-19), 2020-03-10

A.

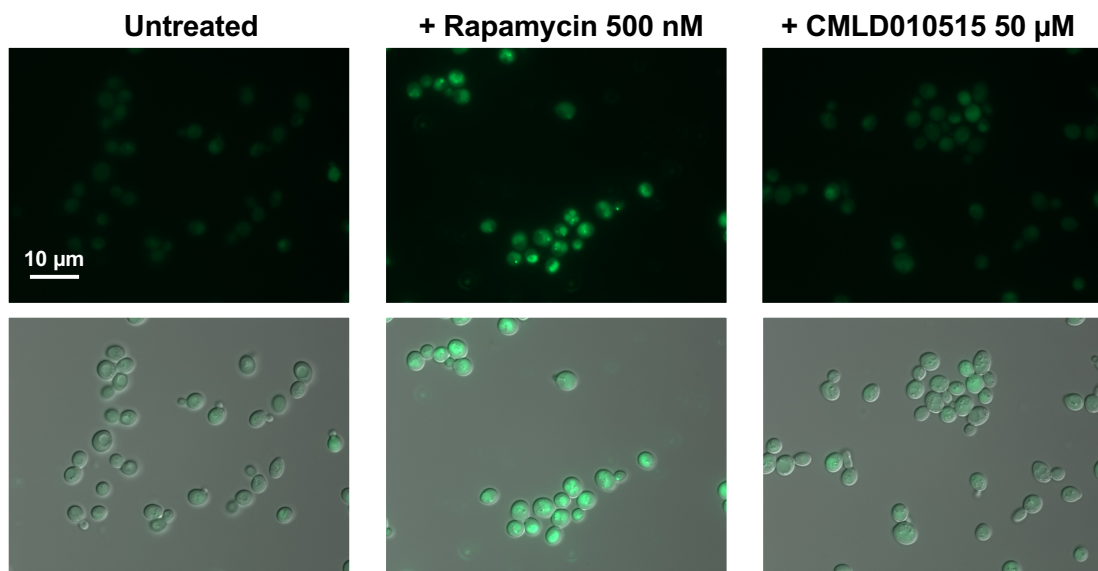

B.

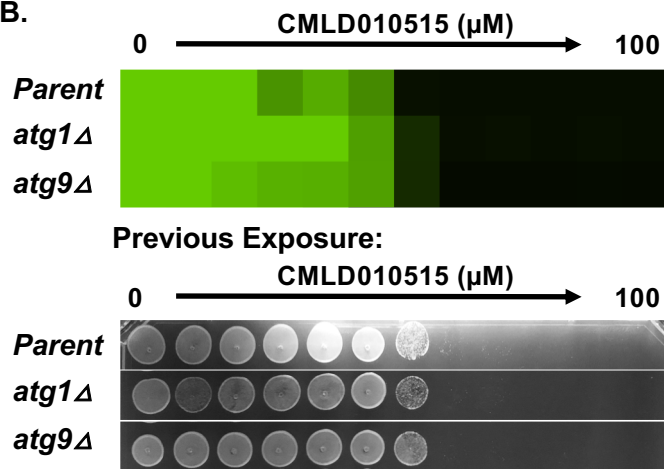

C.

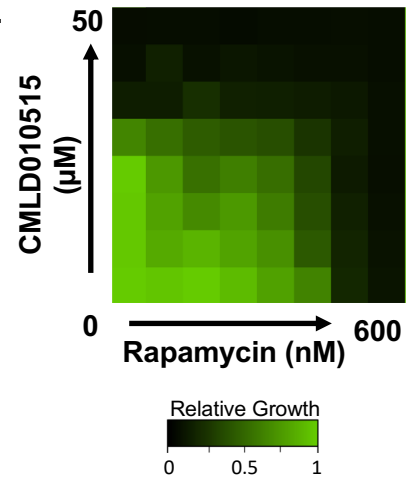

Supplement: mBio.03329-19-sf004.pdf [file mBio.03329-19-sf004.pdf]
