# Supplementary material for: Translation Inhibition by Rocaglates Activates a Species-Specific Cell Death Program in the Emerging Fungal Pathogen Candida auris
Source: PubMed Central journal article supplement (PMC7064782; doi:10.1128/mbio.03329-19), 2020-03-10
Supplement: mBio.03329-19-st001.pdf [file mBio.03329-19-st001.pdf]

**Supplementary Table S1: Strains used in this study**

| Strain ID                                           | Description                                         | Genotype                                                                                                                                  | Source       |
|-----------------------------------------------------|-----------------------------------------------------|-------------------------------------------------------------------------------------------------------------------------------------------|--------------|
| CaLC3438                                            | <i>C. auris</i><br>VPCI 673/P/12                    | Clinical isolate                                                                                                                          | Chowdary Lab |
| CaLC5083                                            | <i>C. auris</i> Ci6684                              | Clinical isolate                                                                                                                          | (1)          |
| ChLC3447                                            | <i>C. haemulonii</i> M3                             | Clinical isolate                                                                                                                          | Chowdary Lab |
| CdLC3482                                            | <i>C. duobushaemulonii</i><br>M20                   | Clinical isolate                                                                                                                          | Chowdary Lab |
| CILC572                                             | <i>C. lusitaniae</i> ATCC<br>42720 reference strain | Clinical isolate                                                                                                                          | (2)          |
| CtLC575                                             | <i>C. tropicalis</i> 1685                           | Clinical isolate                                                                                                                          | Heitman Lab  |
| CaLC239                                             | <i>C. albicans</i> SN95                             | <i>arg4Δ/arg4Δ, his1Δ/his1Δ,<br/>URA3/ura3Δ::imm434<br/>IRO1/iro1Δ::imm434</i>                                                            | (3)          |
| CdLC268                                             | <i>C. dubliniensis</i> MYA-<br>577                  | Clinical isolate                                                                                                                          | (4)          |
| CgLC1002                                            | <i>C. glabrata</i> BG2                              | Clinical isolate                                                                                                                          | (5)          |
| ScLC151                                             | <i>S. cerevisiae</i> BY4741                         | <i>MATa his3Δ1 leu2Δ0<br/>met15Δ0 ura3Δ0</i>                                                                                              | (6)          |
| CnLC3142                                            | <i>Cryptococcus<br/>neoformans</i> H99a             | Clinical isolate                                                                                                                          | (7)          |
| CaLC5280                                            | <i>C. auris cdr1Δ</i>                               | CaLC5083 + <i>cdr1Δ::NatMX</i>                                                                                                            | (8)          |
| CaLC5921                                            | <i>C. auris</i> +<br>CMDL010853<br>resistant        | CaLC5083 + <i>eIF4A<sup>F152I</sup> -<br/>NatMX</i>                                                                                       | This study   |
| CaLC5922                                            | <i>C. auris</i> +<br>CMDL010853<br>resistant        | CaLC5083 + <i>eIF4A<sup>Q184K</sup> -<br/>NatMX</i>                                                                                       | This study   |
| CaLC5989                                            | <i>C. auris</i> +<br>CMDL010853<br>resistant        | CaLC5083 + <i>eIF4A<sup>F152L</sup> -<br/>NatMX</i>                                                                                       | This study   |
| CaLC5543                                            | <i>C. albicans</i> +<br>rocaglate sensitive         | <i>CaLC 239+<br/>Tif1<sup>L153F</sup>/Tif1<sup>L153F</sup></i>                                                                            | This study   |
| CaLC5813                                            | <i>C. auris</i> NAT resistant                       | CaLC5083 + <i>eIF4A -NatMX</i>                                                                                                            | This study   |
| CaLC5814                                            | <i>C. auris</i> rocaglate<br>resistant              | CaLC5083 + <i>eIF4A<sup>F152L</sup> -<br/>NatMX</i>                                                                                       | This study   |
| Yeast<br>Heterozygous<br>Diploid Library<br>YSC1055 | <i>S. cerevisiae</i> BY4743                         | <i>BY4743 (MATa/α;<br/>his3Δ1/his3Δ1; leu2Δ0/leu2<br/>Δ0; met15Δ0/MET15;<br/>LYS2/lys2Δ0;<br/>ura3Δ0/ura3Δ0)<br/>+ HIS3/his3 Δ::KanMX</i> | (6)          |

|                                            |                                          |                                                                   |     |
|--------------------------------------------|------------------------------------------|-------------------------------------------------------------------|-----|
| Yeast Heterozygous Diploid Library YSC1055 | <i>S. cerevisiae</i> BY4743              | BY4743 +<br><i>VOA1/voa1</i> Δ::KanMX                             | (6) |
| Yeast Heterozygous Diploid Library YSC1055 | <i>S. cerevisiae</i> BY4743              | BY4743 +<br><i>PKR1/pkr1</i> Δ::KanMX                             | (6) |
| Yeast Heterozygous Diploid Library YSC1055 | <i>S. cerevisiae</i> BY4743              | BY4743 +<br><i>VMA21/vma21</i> Δ::KanMX                           | (6) |
| Yeast Heterozygous Diploid Library YSC1055 | <i>S. cerevisiae</i> BY4743              | BY4743 +<br><i>VMA3/vma3</i> Δ::KanMX                             | (6) |
| Yeast Heterozygous Diploid Library YSC1055 | <i>S. cerevisiae</i> BY4743              | BY4743 +<br><i>VMA6/vma6</i> Δ::KanMX                             | (6) |
| Yeast Heterozygous Diploid Library YSC1055 | <i>S. cerevisiae</i> BY4743              | BY4743 +<br><i>VMA9/vma9</i> Δ::KanMX                             | (6) |
| Yeast Heterozygous Diploid Library YSC1055 | <i>S. cerevisiae</i> BY4743              | BY4743 +<br><i>VMA11/vma11</i> Δ::KanMX                           | (6) |
| Yeast Heterozygous Diploid Library YSC1055 | <i>S. cerevisiae</i> BY4743              | BY4743 +<br><i>VMA16/vma16</i> Δ::KanMX                           | (6) |
| Yeast Heterozygous Diploid Library YSC1055 | <i>S. cerevisiae</i> BY4743              | BY4743 +<br><i>VPH1/vph1</i> Δ::KanMX                             | (6) |
| Yeast Heterozygous Diploid Library YSC1055 | <i>S. cerevisiae</i> BY4743              | BY4743 +<br><i>VAM3/vam3</i> Δ::KanMX                             | (6) |
| Yeast Heterozygous Diploid Library YSC1055 | <i>S. cerevisiae</i> BY4743              | BY4743 +<br><i>VAM7/vam7</i> Δ::KanMX                             | (6) |
| ScLC6277                                   | <i>S. cerevisiae</i> GFP-<br><i>atg8</i> | <i>MAT</i> α <i>ura3-52 leu2-3,112 his3-200 trp1-901 lys2-801</i> | (9) |

|          |                                              |                                                                                                                                                                                                                                                                                                                                                              |      |
|----------|----------------------------------------------|--------------------------------------------------------------------------------------------------------------------------------------------------------------------------------------------------------------------------------------------------------------------------------------------------------------------------------------------------------------|------|
|          |                                              | <i>suc2- 9 mel GAL GFP-ATG8::LEU2</i>                                                                                                                                                                                                                                                                                                                        |      |
| ScLC6320 | <i>S. cerevisiae</i> Y13206                  | <i>MAT<math>\alpha</math> snq2<math>\Delta</math>::KILeu2;</i><br><i>pdr3<math>\Delta</math>::Klura3;</i><br><i>pdr1<math>\Delta</math>::NATMX;</i><br><i>can1<math>\Delta</math>::STE2pr-Sp_his5</i><br><i>lyp1<math>\Delta</math>; his3<math>\Delta</math>1 leu2<math>\Delta</math>0</i><br><i>ura3<math>\Delta</math>0 met15<math>\Delta</math>0LYS2+</i> | (10) |
|          | <i>S. cerevisiae agt1<math>\Delta</math></i> | ScLC6320 <i>agt1<math>\Delta</math>::KANMX</i>                                                                                                                                                                                                                                                                                                               | (10) |
|          | <i>S. cerevisiae agt9<math>\Delta</math></i> | ScLC6320 <i>agt9<math>\Delta</math>::KANMX</i>                                                                                                                                                                                                                                                                                                               | (10) |
