# Supplementary material for: Translation Inhibition by Rocaglates Activates a Species-Specific Cell Death Program in the Emerging Fungal Pathogen Candida auris
Source: PubMed Central journal article supplement (PMC7064782; doi:10.1128/mbio.03329-19), 2020-03-10
Supplement: mBio.03329-19-st003.pdf [file mBio.03329-19-st003.pdf]

**Supplementary Table S3: Oligonucleotides used in this study**

| Oligo ID | Description        | Sequence (5' to 3')                                              |
|----------|--------------------|------------------------------------------------------------------|
| oLC6944  | CaTIF1_orf448 -2 F | AAATTGTCGTTGGTACTCCAGGTAGAGTCTTCG<br>ACATGATTGAAAGAAGATATTTCAAAA |
| oLC6945  | CaTIF1_orf448-2 R  | TTTTGAAATATCTTCTTTCAATCATGTCGAAGAC<br>TCTACCTGGAGTACCAACGACAATTT |
| oLC6972  | CaTIF1_orf296 F    | AACCAGAGAATTGGCTTTGC                                             |
| oLC6923  | CaTIF1_orf663 R    | CCAAATTCATGAACAACCCA                                             |
| oLC7157  | CauEIF4a-477 F     | TACCTCAAAGCCCTGTTCC                                              |
| oLC7158  | CauEIF4a+1204 R    | GAGTTGCCGAGGTGATCAAT                                             |
| oLC7153  | CauEIF4a-567 F     | ACTGTTGCAATGCGTAGTCG                                             |
| oLC6398  | CaSFL1AB+1550-R    | TTACTGTCTTCACGTGCACG                                             |
| oLC274   | pJK863down-F       | CTGTCAAGGAGGGTATTCTGG                                            |
| oLC7156  | CauEIF4a+1296 R    | CGAGAACGGTATTTACTTCG                                             |
| oLC7157  | CauEIF4a-477 F     | TACCTCAAAGCCCTGTTCC                                              |
| oLC7158  | CauEIF4a+1204 R    | GAGTTGCCGAGGTGATCAAT                                             |
| oLC6918  | CaTIF1 Repair T    | ATTTGATCATGTCTAAGACTCTACCG                                       |
| oLC6919  | CaTIF1 Repair B    | AAAACGGTAGAGTCTTAGACATGATC                                       |
| oLC4609  | snr52p-F           | GAAACTTCGGCCAATAGGATTGG                                          |
| oLC7154  | CauEIF4a+212 R     | CTATACTGCTGTCGATTCGATACTAACGCCGCC<br>ATCCAGTGCGTCAAGAATAATTGGACG |
| oLC7155  | CauEIF4a+266 F     | CGCTGGCCGGGTGACCCGGCGGGGACGAGGCA<br>AGCTTGATTCTGACTCATTCACTAAGTC |
| oLC6296  | pLC605 NAT F       | ACTGGATGGCGGCGTTAGTA                                             |
| oLC6304  | pLC605 NAT R       | ATCAAGCTTGCCCTCGTCC                                              |
| oLC243   | M13-R              | CAGGAAACAGCTATGAC                                                |
| oLC7166  | CauEIF4a-197 R     | GATGGCTCGAGGTTCAAGAG                                             |
| oLC244   | M13-F              | GTAAAACGACGGCCAG                                                 |
| oLC7167  | CauEIF4a+823 F     | ACCAGGATTGGCAAACAGAC                                             |
| oLC7200  | puc19 MCS F        | AATTTACACACAGGAAACAGC                                            |
| oLC7201  | CauEIF4a-88 F      | CATACAGTAAGGCGAGTCTC                                             |
| oLC7202  | CauEIF4aorf_465 F  | GACAGAAGATACTTCAAGAC                                             |
| oLC7203  | CauEIF4aorf_996 F  | GTTATTAACACTACGACTTGCC                                           |
| oLC7204  | CauEIF4a+297 F     | CGTTTTGACTATTACCCGAG                                             |
| oLC3854  | CaNAT+206-R        | GATTCATCATCGGATTCATC                                             |
| oLC7161  | CauEIF4aorf_435 F  | GGTACTCCTGGTAGAGTGTTAGACATGATCGAC<br>AGAAGATACTTC                |
| oLC7162  | CauEIF4aorf_435 R  | GAAGTATCTTCTGTCGATCATGTCTAACACTCT<br>ACCAGGAGTACC                |
| oLC7720  | Cauris MCA1-1032   | CTGCTGCGGCTAAGAAGACT                                             |
| oLC7721  | NAT_CaurisMCA1-47  | CTATACTGCTGTCGATTCGATACTAACGCCGCC<br>ATCCAGTGAAGCTTGTGCCTGGTTTCT |

|         |                   |                                                                   |
|---------|-------------------|-------------------------------------------------------------------|
| oLC7722 | NAT_CaurisMCA1+2  | CGCTGGCCGGGTGACCCGGCGGGGACGAGGCA<br>AGCTTGATGGCCTTAGCAGAGTGTTCAGC |
| oLC7723 | Cauris_MCA1+836   | GTGTTCCGACAACGGAGTTT                                              |
| oLC7724 | Cauris_MCA1-908   | GATTGACTTGTTGGGCTCGT                                              |
| oLC7725 | Cauris_MCA1-908   | CCTGCTGAGCAACAACCTCTG                                             |
| oLC7726 | Cauris_MCA1-1092  | GACCAGGTGCCAAAGTGATT                                              |
| oLC7727 | CaurisMCA1_orf48  | AGGTTCCCTTTGGATCGAGT                                              |
| oLC7728 | CaurisMCA1_orf587 | CAGCAAGGTTACAACCAGCA                                              |
| oLC7729 | Cauris_MCA1+875   | GCATGGCCCTGATGATATTT                                              |
